# Supplementary material for: Pseudopolymorphs – a variety of self-organization of para-sulphonato-calix[8]arene and phenanthroline in the solid state
Source: Royal Society of Chemistry journal article supplement (doi:10.1039/c6ce01753c), 2016-01-01
Supplement: c6ce01753c1.pdf [file c6ce01753c1.pdf]

## Pseudopolymorphs - a variety of self-organization of *para*-sulphonato-calix[8]arene and phenanthroline in the solid state

Barbara Leśniewska<sup>1\*</sup>, Anthony W. Coleman<sup>2</sup>, Yannick Tauran<sup>2</sup>, Florent Perret<sup>3</sup> and Kinga Suwińska<sup>4,5\*</sup>

<sup>1</sup>Institute of Physical Chemistry, Polish Academy of Sciences, Kasprzaka 44/52, 01-224 Warsaw, Poland

<sup>2</sup>LMI, Université Lyon 1, CNRS UMR 5615, 43 bvd 11 novembre, 69622Villeurbanne, France

<sup>3</sup>Institut de Chimie et Biochimie Moléculaires et Supramoléculaires, Université Lyon 1, 43 bvd 11 novembre, 69622Villeurbanne, France

<sup>4</sup>Faculty of Mathematics and Natural Sciences, Cardinal Stefan Wyszyński University, Wóycickiego 1/3, PL-01 938 Warsaw

<sup>5</sup>A. M. Butlerov Institute of Chemistry, Kazan Federal University, Kremlevskaya 18, 420008 Kazan, Russia

**Table S1. Interactions present in the structure of complex 1.**

| Hydrogen bonding (Å and °) |                         |                         |                                  |                   |
|----------------------------|-------------------------|-------------------------|----------------------------------|-------------------|
| <i>D</i> —H⋯ <i>A</i>      | <i>d</i> ( <i>D</i> —H) | <i>d</i> (H⋯ <i>A</i> ) | <i>d</i> ( <i>D</i> ⋯ <i>A</i> ) | <(D—H⋯ <i>A</i> ) |
| O4A—H4A1⋯O1A1 <sup>1</sup> | 0.84                    | 2.39                    | 2.82(3)                          | 113               |
| O4A—H4A1⋯O1A2 <sup>1</sup> | 0.84                    | 1.89                    | 2.37(4)                          | 115               |
| O4B—H4B1⋯O4C               | 0.84                    | 2.02                    | 2.86(2)                          | 174               |
| O4C—H4C1⋯O1W               | 0.84                    | 1.90                    | 2.61(2)                          | 142               |
| O4D—H4D1⋯O1W               | 0.84                    | 2.55                    | 3.23(2)                          | 138               |
| O4D—H4D1⋯O4E               | 0.84                    | 2.65                    | 2.89(2)                          | 99                |
| O4E—H4E1⋯O1W               | 0.84                    | 2.34                    | 3.11(2)                          | 153               |
| O4F—H4F1⋯O2H               | 0.84                    | 1.94                    | 2.71(2)                          | 152               |
| O4G—H4G1⋯O2G <sup>2</sup>  | 0.84                    | 1.91                    | 2.74(2)                          | 167               |
| O4H—H4H1⋯O1B1 <sup>1</sup> | 0.84                    | 1.84                    | 2.59(3)                          | 149               |
| O4H—H4H1⋯O1B2 <sup>1</sup> | 0.84                    | 2.02                    | 2.61(4)                          | 127               |
| N2X—H2X1⋯O5W               | 0.88                    | 1.84                    | 2.69(3)                          | 163               |
| N2Y—H2Y1⋯O22W              | 0.88                    | 1.85                    | 2.71(3)                          | 163               |
| N2O—H2O1⋯O32W              | 0.88                    | 1.95                    | 2.80(4)                          | 163               |
| N1Z—H1ZN⋯O3B1 <sup>1</sup> | 0.88                    | 2.21                    | 3.01(4)                          | 151               |
| N2W—H2W1⋯O2C1 <sup>1</sup> | 0.88                    | 2.38                    | 3.10(3)                          | 140               |
| N2V—H2V1⋯O18W              | 0.88                    | 1.79                    | 2.51(5)                          | 137               |
| N2M—H2M1⋯O18W              | 0.88                    | 2.09                    | 2.91(5)                          | 156               |
| C7A—H7A1⋯O1A1 <sup>1</sup> | 0.99                    | 2.58                    | 3.23(3)                          | 124               |
| C1Q—H1Q⋯O8W                | 0.95                    | 2.17                    | 3.03(3)                          | 150               |
| C1R—H1R⋯O3C <sup>3</sup>   | 0.95                    | 2.55                    | 3.37(6)                          | 145               |
| C1Y—H1Y⋯O3A1 <sup>4</sup>  | 0.95                    | 2.59                    | 3.50(4)                          | 160               |
| C1Y—H1Y⋯O3A2 <sup>4</sup>  | 0.95                    | 2.38                    | 3.28(6)                          | 158               |
| C2L—H2L⋯O3G <sup>5</sup>   | 0.95                    | 2.44                    | 3.09(4)                          | 126               |
| C2T—H2T⋯O3G <sup>5</sup>   | 0.95                    | 2.57                    | 3.21(3)                          | 124               |
| C2W—H2W⋯O3F2 <sup>2</sup>  | 0.95                    | 1.93                    | 2.87(4)                          | 169               |
| C3X—H3X⋯O2G <sup>2</sup>   | 0.95                    | 2.49                    | 3.41(2)                          | 163               |
| C3Z—H3Z⋯O1G <sup>2</sup>   | 0.95                    | 2.34                    | 3.09(2)                          | 136               |
| C6W—H6W⋯O1C2 <sup>1</sup>  | 0.95                    | 2.51                    | 3.26(6)                          | 136               |
| C7O—H7O⋯O4B <sup>1</sup>   | 0.95                    | 2.55                    | 3.37(3)                          | 144               |
| C7Q—H7Q⋯O1F1 <sup>4</sup>  | 0.95                    | 2.40                    | 3.12(4)                          | 132               |
| C7Z—H7Z⋯O2E1 <sup>6</sup>  | 0.95                    | 2.48                    | 3.21(3)                          | 134               |

|                              |      |      |         |     |
|------------------------------|------|------|---------|-----|
| C8L—H8L···O1A1 <sup>7</sup>  | 0.95 | 2.55 | 3.39(4) | 147 |
| C8L—H8L···O1A2 <sup>7</sup>  | 0.95 | 2.54 | 3.36(6) | 144 |
| C8X—H8X···O4C <sup>6</sup>   | 0.95 | 2.50 | 3.28(3) | 139 |
| C8Z—H8Z···O1D <sup>6</sup>   | 0.95 | 2.60 | 3.46(3) | 151 |
| C8Z—H8Z···O3D <sup>6</sup>   | 0.95 | 2.41 | 3.27(3) | 151 |
| C7E—H7E2···O22W <sup>1</sup> | 0.99 | 2.52 | 3.34(4) | 140 |
| C7E—H7E2···O23W <sup>1</sup> | 0.99 | 2.47 | 3.40(6) | 156 |
| C11T—H11T···O4A <sup>5</sup> | 0.95 | 2.49 | 3.24(4) | 136 |
| C11Y—H11Y···O4F <sup>4</sup> | 0.95 | 2.44 | 3.37(4) | 166 |
| C12M—H12M···O4B <sup>5</sup> | 0.95 | 2.44 | 3.18(4) | 135 |
| C7H—H7H1···O1B2 <sup>1</sup> | 0.99 | 2.32 | 3.09(5) | 134 |
| C3V—H3V···O3H                | 0.95 | 2.17 | 3.06(2) | 156 |

Symmetry operations: (1) 1-x,-y,1-z; (2) -x,1-y,1-z; (3) x,1+y,-1+z; (4) 1+x,y,z; (5) 1-x,1-y,1-z; (6) -x,-y,1-z; (7) x,1+y,z.

### Interactions X—H··· $\pi$ (Å and °)

| C—H···CgJ                    | $d(\text{H}\cdots\text{Cg})$ | $\perp d(\text{H}\cdots\pi)$ | $\gamma$ | $\langle \text{C—H}\cdots\text{Cg}$ | $d(\text{C}\cdots\text{Cg})$ | $\langle \text{C—H}, \pi$ |
|------------------------------|------------------------------|------------------------------|----------|-------------------------------------|------------------------------|---------------------------|
| C3T—H3T···CgH <sup>1</sup>   | 2.82                         | 2.71                         | 15.71    | 160                                 | 3.72(2)                      | 56                        |
| C7C—H7C1···CgV3 <sup>1</sup> | 3.00                         | 2.76                         | 22.98    | 121                                 | 3.61(2)                      | 53                        |
| C7C—H7C2···CgJ3 <sup>1</sup> | 2.85                         | 2.82                         | 8.59     | 148                                 | 3.73(2)                      | 66                        |
| C6X—H6X···CgE <sup>2</sup>   | 2.69                         | -2.62                        | 12.39    | 160                                 | 3.60(2)                      | 77                        |
| C7X—H7X···CgD <sup>2</sup>   | 2.74                         | -2.69                        | 10.55    | 158                                 | 3.64(2)                      | 59                        |
| C1O—H1O···CgH                | 2.99                         | -2.78                        | 21.67    | 135                                 | 3.72(2)                      | 60                        |
| C2M—H2M···CgL1               | 2.79                         | 2.69                         | 15.78    | 112                                 | 3.27(2)                      | 19                        |
| C7C—H7C1···CgM3 <sup>1</sup> | 2.85                         | 2.60                         | 24.14    | 113                                 | 3.36(2)                      | 46                        |
| C11L—H11L···CgH <sup>1</sup> | 3.00                         | 2.84                         | 18.71    | 162                                 | 3.91(2)                      | 62                        |

### Interactions $\pi\cdots\pi$ (Å and °)

| CgI···CgJ                | $d(\text{CgI}\cdots\text{CgJ})$ | $\alpha$ | $\beta$ | $\gamma$ | CgI perp. | CgJ perp. |
|--------------------------|---------------------------------|----------|---------|----------|-----------|-----------|
| CgA···CgA <sup>3</sup>   | 3.98(2)                         | 0        | 23.72   | 23.72    | 3.65(2)   | 3.65(2)   |
| CgC···CgV2 <sup>1</sup>  | 4.62(2)                         | 6.8      | 32.75   | 38.18    | 3.63(2)   | 3.89(2)   |
| CgC···CgV3 <sup>1</sup>  | 4.48(2)                         | 11.1     | 37.86   | 30.60    | 3.86(2)   | 3.54(2)   |
| CgD···CgJ1 <sup>4</sup>  | 3.77(2)                         | 3.7      | 20.14   | 23.78    | -3.45(2)  | 3.54(2)   |
| CgD···CgJ1 <sup>1</sup>  | 4.81(2)                         | 3.7      | 44.57   | 42.46    | 3.55(2)   | 3.42(2)   |
| CgD···CgJ2 <sup>4</sup>  | 4.54(2)                         | 7.4      | 45.08   | 41.37    | -3.41(2)  | 3.21(2)   |
| CgD···CgJ2 <sup>1</sup>  | 4.20(2)                         | 7.4      | 26.66   | 33.93    | 3.49(2)   | 3.76(2)   |
| CgD···CgJ3 <sup>4</sup>  | 3.52(2)                         | 6.6      | 18.56   | 11.94    | -3.44(2)  | 3.34(2)   |
| CgD···CgJ3 <sup>1</sup>  | 4.62(2)                         | 6.6      | 38.34   | 39.03    | 3.59(2)   | 3.63(2)   |
| CgG···CgG <sup>5</sup>   | 3.69(2)                         | 0        | 25.53   | 25.53    | -3.33(2)  | -3.33(2)  |
| CgH···CgY1 <sup>6</sup>  | 4.92(2)                         | 5.0      | 13.44   | 64.69    | -2.11(2)  | -4.79(2)  |
| CgK1···CgK2 <sup>1</sup> | 4.13(2)                         | 6.1      | 30.35   | 26.67    | 3.70(2)   | 3.57(2)   |
| CgK1···CgK3 <sup>1</sup> | 4.71(2)                         | 7.0      | 39.35   | 33.28    | -3.93(2)  | 3.64(2)   |
| CgK1···CgT1 <sup>1</sup> | 3.58(2)                         | 1.2      | 22.92   | 23.30    | -3.29(2)  | -3.30(2)  |
| CgK1···CgT3 <sup>1</sup> | 4.83(2)                         | 1.5      | 46.48   | 46.24    | -3.34(2)  | -3.33(2)  |
| CgK2···CgK3 <sup>1</sup> | 4.00(2)                         | 7.9      | 16.81   | 24.56    | -3.64(2)  | 3.83(2)   |
| CgK2···CgT1 <sup>1</sup> | 4.25(2)                         | 7.3      | 43.55   | 40.57    | -3.23(2)  | -3.08(2)  |
| CgK2···CgT3 <sup>1</sup> | 4.00(2)                         | 5.2      | 32.88   | 34.17    | -3.31(2)  | -3.36(2)  |
| CgK3···CgK3 <sup>1</sup> | 3.91(2)                         | 0        | 13.39   | 13.39    | -3.80(2)  | -3.80(2)  |
| CgK3···CgT1 <sup>1</sup> | 3.47(2)                         | 7.7      | 18.48   | 25.86    | -3.12(2)  | 3.29(2)   |
| CgK3···CgT3 <sup>1</sup> | 4.55(2)                         | 5.6      | 42.89   | 44.59    | -3.24(2)  | 3.34(2)   |
| CgR1···CgW1              | 3.73(2)                         | 6.9      | 26.50   | 19.73    | -3.51(2)  | 3.34(2)   |
| CgR1···CgW2 <sup>7</sup> | 3.41(2)                         | 6.9      | 10.34   | 16.53    | -3.26(2)  | -3.35(2)  |
| CgR1···CgW3              | 4.22(2)                         | 6.9      | 34.59   | 33.71    | -3.51(2)  | 3.48(2)   |
| CgR1···CgW3 <sup>7</sup> | 4.28(2)                         | 6.9      | 35.07   | 40.24    | -3.26(2)  | -3.50(2)  |

|                          |         |      |       |       |          |          |
|--------------------------|---------|------|-------|-------|----------|----------|
| CgR2...CgW1              | 4.77(2) | 2.2  | 46.75 | 44.54 | -3.40(2) | 3.27(2)  |
| CgR2...CgW1 <sup>7</sup> | 3.71(2) | 2.2  | 24.13 | 24.51 | -3.38(2) | -3.39(2) |
| CgR2...CgW2              | 3.74(2) | 2.2  | 23.99 | 24.37 | -3.40(2) | 3.41(2)  |
| CgR2...CgW3              | 4.28(2) | 2.2  | 39.07 | 37.27 | -3.40(2) | 3.32(2)  |
| CgR2...CgW3 <sup>7</sup> | 3.76(2) | 2.2  | 24.08 | 26.17 | -3.38(2) | -3.43(2) |
| CgR3...CgW1              | 3.56(2) | 2.0  | 19.40 | 19.76 | -3.35(2) | 3.35(2)  |
| CgR3...CgW1 <sup>7</sup> | 4.63(2) | 2.0  | 43.91 | 42.13 | -3.43(2) | -3.33(2) |
| CgR3...CgW2              | 4.87(2) | 2.0  | 44.98 | 46.60 | -3.35(2) | 3.45(2)  |
| CgR3...CgW2 <sup>7</sup> | 3.88(2) | 2.0  | 28.18 | 27.94 | -3.43(2) | -3.42(2) |
| CgR3...CgW3              | 4.19(2) | 2.0  | 35.04 | 37.04 | -3.35(2) | 3.43(2)  |
| CgR3...CgW3 <sup>7</sup> | 3.52(2) | 2.0  | 13.97 | 12.52 | -3.43(2) | -3.41(2) |
| CgT1...CgV1              | 4.33(2) | 7.9  | 38.34 | 32.53 | -3.65(2) | 3.40(2)  |
| CgT2...CgV1              | 3.72(2) | 8.9  | 22.48 | 31.22 | -3.18(2) | 3.44(2)  |
| CgT2...CgV2              | 4.10(2) | 5.9  | 42.17 | 44.51 | -2.92(2) | 3.04(2)  |
| CgT2...CgV3              | 3.58(2) | 6.4  | 26.72 | 27.73 | -3.16(2) | 3.20(2)  |
| CgT3...CgV1              | 3.74(2) | 6.6  | 22.94 | 27.14 | -3.34(2) | 3.45(2)  |
| CgT3...CgV3              | 3.79(2) | 2.8  | 31.10 | 28.57 | -3.33(2) | 3.24(2)  |
| CgW1...CgZ1              | 3.90(2) | 2.3  | 29.27 | 28.17 | -3.44(2) | 3.40(2)  |
| Cg W1...CgZ2             | 4.07(2) | 3.0  | 34.33 | 31.51 | -3.47(2) | 3.36(2)  |
| Cg W1...CgZ3             | 3.58(2) | 1.9  | 15.91 | 17.04 | 3.42(2)  | 3.44(2)  |
| Cg W2...CgZ2             | 3.85(2) | 3.0  | 29.18 | 32.17 | -3.25(2) | 3.36(2)  |
| Cg W3...CgZ2             | 3.63(2) | 3.0  | 22.39 | 23.02 | -3.34(2) | 3.36(2)  |
| Cg W3...CgZ3             | 3.94(2) | 1.9  | 29.24 | 30.45 | -3.40(2) | 3.44(2)  |
| CgX1...CgY1 <sup>6</sup> | 3.59(2) | 4.0  | 19.10 | 19.14 | -3.39(2) | 3.39(2)  |
| CgX1...CgY2 <sup>6</sup> | 4.57(2) | 5.8  | 41.44 | 44.69 | -3.24(2) | 3.42(2)  |
| CgX1...CgY3 <sup>6</sup> | 3.73(2) | 5.6  | 21.22 | 25.46 | -3.37(2) | 3.48(2)  |
| CgX1...CgZ1              | 3.59(2) | 3.0  | 18.29 | 20.51 | 3.36(2)  | -3.41(2) |
| CgX1...CgZ2              | 4.59(2) | 4.1  | 43.95 | 44.48 | 3.28(2)  | -3.31(2) |
| CgX1...CgZ3              | 3.60(2) | 1.9  | 21.00 | 21.60 | 3.35(2)  | -3.36(2) |
| CgX2...CgY2 <sup>6</sup> | 4.64(2) | 7.9  | 40.64 | 47.53 | -3.13(2) | 3.52(2)  |
| CgX2...CgZ2              | 4.11(2) | 3.0  | 35.26 | 32.67 | 3.46(2)  | -3.36(2) |
| CgX2...CgZ3              | 4.39(2) | 0.5  | 40.47 | 40.03 | 3.36(2)  | -3.34(2) |
| CgX3...CgY1 <sup>6</sup> | 4.85(2) | 4.6  | 47.17 | 46.10 | -3.37(2) | 3.30(2)  |
| CgX3...CgY2 <sup>6</sup> | 3.64(2) | 7.5  | 15.23 | 22.73 | -3.36(2) | 3.51(2)  |
| CgX3...CgY3 <sup>6</sup> | 4.20(2) | 6.1  | 34.13 | 37.59 | -3.33(2) | 3.48(2)  |
| CgX3...CgZ1              | 4.76(2) | 3.4  | 43.19 | 46.35 | 3.28(2)  | -3.47(2) |
| CgX3...CgZ2              | 4.54(2) | 1.7  | 42.49 | 41.73 | 3.39(2)  | -3.35(2) |
| CgX3...CgZ3              | 3.56(2) | 1.1  | 19.31 | 20.00 | 3.35(2)  | -3.36(2) |
| CgY1...CgY1 <sup>8</sup> | 3.98(2) | 0    | 31.29 | 31.29 | 3.40(2)  | 3.40(2)  |
| CgY1...CgY2 <sup>8</sup> | 4.03(2) | 3.8  | 34.06 | 30.23 | 3.48(2)  | 3.34(2)  |
| CgY1...CgY3 <sup>8</sup> | 3.83(2) | 1.6  | 27.82 | 26.22 | 3.43(2)  | 3.38(2)  |
| CgC...CgM2 <sup>1</sup>  | 4.04(2) | 1.7  | 32.94 | 33.32 | 3.38(2)  | 3.39(2)  |
| CgC...CgM3 <sup>1</sup>  | 4.04(2) | 4.3  | 36.09 | 35.79 | 3.27(2)  | 3.26(2)  |
| CgL1...CgM1              | 4.27(2) | 19.9 | 35.93 | 53.43 | -2.54(2) | 3.45(2)  |
| CgL1...CgQ2 <sup>1</sup> | 4.61(2) | 12.3 | 48.31 | 36.93 | -3.69(2) | -3.07(2) |
| CgL2...CgM1              | 3.72(2) | 12.2 | 21.42 | 12.25 | -3.63(2) | 3.46(2)  |
| CgL2...CgM2              | 4.98(2) | 12.8 | 34.02 | 43.70 | -3.60(2) | 4.13(2)  |
| CgL2...CgM3              | 3.88(2) | 10.0 | 18.19 | 19.95 | -3.65(2) | 3.69(2)  |
| CgL2...CgQ2 <sup>1</sup> | 3.80(2) | 9.5  | 27.14 | 35.68 | -3.09(2) | -3.38(2) |
| CgO1...CgO1 <sup>5</sup> | 4.26(2) | 0    | 38.05 | 38.05 | 3.35(2)  | 3.35(2)  |
| CgO1...CgO2 <sup>5</sup> | 3.76(2) | 3.5  | 24.73 | 23.61 | 3.44(2)  | 3.41(2)  |
| CgO1...CgO3 <sup>5</sup> | 3.60(2) | 3.7  | 17.67 | 17.84 | 3.42(2)  | 3.43(2)  |
| CgO1...CgX1              | 3.45(2) | 9.0  | 11.95 | 20.96 | 3.22(2)  | -3.38(2) |
| CgO1...CgX3              | 4.74(2) | 11.4 | 38.59 | 48.70 | 3.13(2)  | -3.71(2) |
| CgO2...CgX1              | 4.81(2) | 11.4 | 47.13 | 38.46 | 3.77(2)  | -3.27(2) |

|                          |         |      |       |       |         |          |
|--------------------------|---------|------|-------|-------|---------|----------|
| CgO2...CgX2              | 4.68(2) | 13.5 | 44.82 | 34.62 | 3.86(2) | -3.32(2) |
| CgO2...CgX3              | 3.91(2) | 13.6 | 23.42 | 9.86  | 3.85(2) | -3.58(2) |
| CgO3...CgO3 <sup>2</sup> | 4.40(2) | 0    | 40.53 | 40.53 | 3.34(2) | 3.34(2)  |
| CgO3...CgX1              | 3.85(2) | 7.1  | 27.53 | 28.69 | 3.38(2) | -3.42(2) |
| CgO3...CgX2              | 4.11(2) | 9.2  | 34.64 | 34.54 | 3.38(2) | -3.38(2) |
| CgO3...CgX3              | 3.77(2) | 9.1  | 17.59 | 26.62 | 3.37(2) | -3.60(2) |
| CgQ1...CgQ1 <sup>1</sup> | 4.45(2) | 0    | 43.01 | 43.01 | 3.25(2) | 3.25(2)  |
| CgQ1...CgQ2 <sup>1</sup> | 3.47(2) | 1.2  | 19.09 | 20.20 | 3.26(2) | 3.28(2)  |
| CgQ1...CgQ3 <sup>1</sup> | 3.62(2) | 0.5  | 25.69 | 25.67 | 3.26(2) | 3.26(2)  |
| CgQ2...CgQ3 <sup>1</sup> | 4.77(2) | 0.7  | 47.62 | 46.90 | 3.26(2) | 3.22(2)  |
| CgQ3...CgQ3 <sup>1</sup> | 4.24(2) | 0    | 40.01 | 40.01 | 3.25(2) | 3.25(2)  |

Symmetry operations: (1) 1-x,1-y,1-z; (2) -x,-y,1-z; (3) 1-x,-y,1-z; (4) -1+x,-1+y,1+z; (5) -x,1-y,1-z; (6) -1+x,y,z; (7) 1-x,1-y,-z; (8) 2-x,-y,1-z.

CgI – center of gravity of ring number I;  $\alpha$  – dihedral angle between planes I and J ( $^\circ$ );  $\beta$  – angle between Cg I...Cg J vector and normal to plane I ( $^\circ$ );  $\gamma$  – angle between Cg I...Cg J vector and normal to plane J ( $^\circ$ ); Cg...Cg – distance between ring centroids ( $\text{\AA}$ ); CgI perp. – perpendicular distance of CgI on ring J ( $\text{\AA}$ ); CgJ perp. – perpendicular distance of CgJ on ring J ( $\text{\AA}$ );  $\perp d(\text{H}\cdots\pi)$  – distance between H atom and plane of the ring

**Table S2. Interactions present in the structure of complex 2.**

| Hydrogen bonding ( $\text{\AA}$ and $^\circ$ ) |                   |                |                |                                |
|------------------------------------------------|-------------------|----------------|----------------|--------------------------------|
| $D\text{---}H\cdots A$                         | $d(D\text{---}H)$ | $d(H\cdots A)$ | $d(D\cdots A)$ | $\angle(D\text{---}H\cdots A)$ |
| O1S—H1S...O2A1 <sup>1</sup>                    | 0.84              | 1.96           | 2.69(1)        | 145                            |
| O4A—H4A1...O4D <sup>2</sup>                    | 0.84              | 1.81           | 2.628(8)       | 164                            |
| O4B—H4B1...O4C                                 | 0.84              | 1.87           | 2.685(7)       | 164                            |
| O4C—H4C1...O4D                                 | 0.84              | 1.68           | 2.477(8)       | 159                            |
| N2X—H2X1...O3C <sup>3</sup>                    | 0.88              | 1.97           | 2.772(9)       | 151                            |
| N2Z—H2Z1...O1W                                 | 0.88              | 1.91           | 2.705(9)       | 150                            |
| N1V—H1V1...O3W                                 | 0.88              | 1.91           | 2.73(1)        | 155                            |
| N1U—H1U1...O4W                                 | 0.88              | 1.97           | 2.80(1)        | 157                            |
| N2Y—H2YN...O13W                                | 0.88              | 1.85           | 2.676(1)       | 155                            |
| N2W—H2W1...O14W                                | 0.88              | 1.88           | 2.747(1)       | 167                            |
| C7A—H7A1...O1S                                 | 0.99              | 2.38           | 3.37(1)        | 174                            |
| C1U—H1U...O9W <sup>4</sup>                     | 0.95              | 2.59           | 3.16(2)        | 119                            |
| C1U—H1U...O3B1                                 | 0.95              | 2.63           | 3.43(2)        | 142                            |
| C2U—H2U...O4A                                  | 0.95              | 2.69           | 3.27(2)        | 120                            |
| C3V—H3V...O6W <sup>4</sup>                     | 0.95              | 2.50           | 3.33(1)        | 146                            |
| C3X—H3X...O3A1 <sup>2</sup>                    | 0.95              | 2.34           | 3.25(1)        | 162                            |
| C6X—H6X...O5W <sup>5</sup>                     | 0.95              | 2.53           | 3.39(1)        | 151                            |
| C6Y—H6Y...O2C                                  | 0.95              | 2.30           | 3.15(1)        | 150                            |
| C6Z—H6Z...O1C <sup>3</sup>                     | 0.95              | 2.45           | 3.24(1)        | 141                            |
| C7Z—H7Z...O5W <sup>3</sup>                     | 0.95              | 2.57           | 3.21(1)        | 125                            |
| C8U—H8U...O1B1                                 | 0.95              | 2.38           | 3.31(1)        | 167                            |
| C8Y—H8Y...O2W                                  | 0.95              | 2.37           | 3.218(1)       | 148                            |
| C11U—H11U...O3A1 <sup>6</sup>                  | 0.95              | 2.56           | 3.43(1)        | 152                            |
| C11V—H11V...O6W <sup>4</sup>                   | 0.95              | 2.43           | 3.28(1)        | 149                            |
| C11X—H11X...O2A1 <sup>2</sup>                  | 0.95              | 2.47           | 3.39(2)        | 164                            |

Symmetry operations: (1)  $\frac{1}{2}\text{-x}, -1/2\text{-y}, -z$ ; (2)  $\frac{1}{2}\text{-x}, 1/2\text{-y}, -z$ ; (3)  $\frac{1}{2}\text{-x}, 1/2\text{+y}, 1/2\text{-z}$ ; (4)  $-1/2\text{+x}, 1/2\text{+y}, z$ ; (5)  $x, 1\text{+y}, z$ ; (6)  $-x, -y, -z$ .

| Interactions $X\text{---}H\cdots\pi$ ( $\text{\AA}$ and $^\circ$ ) |                 |                       |          |                                |                 |                            |
|--------------------------------------------------------------------|-----------------|-----------------------|----------|--------------------------------|-----------------|----------------------------|
| $C\text{---}H\cdots CgJ$                                           | $d(H\cdots Cg)$ | $\perp d(H\cdots\pi)$ | $\gamma$ | $\angle C\text{---}H\cdots Cg$ | $d(C\cdots Cg)$ | $\angle C\text{---}H, \pi$ |
| C7B—H7B1...CgZ3                                                    | 2.87            | -2.78                 | 14.16    | 136                            | 3.643(9)        | 48                         |
| C3Y—H3Y...CgD <sup>1</sup>                                         | 2.94            | -2.78                 | 19.40    | 161                            | 3.85(1)         | 84                         |

|                            |      |       |       |     |          |    |
|----------------------------|------|-------|-------|-----|----------|----|
| C7C–H7C1…CgX3 <sup>2</sup> | 2.84 | 2.82  | 7.66  | 140 | 3.656(8) | 43 |
| C8X–H8X…CgB <sup>3</sup>   | 2.89 | -2.69 | 21.24 | 165 | 3.816(9) | 59 |
| C8Z–H8Z…CgD                | 2.66 | 2.65  | 6.45  | 151 | 3.526(8) | 58 |
| C12Z–H12Z…CgA <sup>4</sup> | 2.58 | 2.56  | 6.41  | 154 | 3.453(8) | 58 |
| C1W–H1W…CgD <sup>1</sup>   | 2.93 | -2.77 | 19.25 | 167 | 3.86(3)  | 84 |
| C2W–H2W…CgX1 <sup>5</sup>  | 2.84 | 2.63  | 21.85 | 153 | 3.71(3)  | 42 |

**Interactions  $\pi \cdots \pi$  (Å and °)**

| <b>CgI…CgJ</b>         | <b>d(CgI…CgJ)</b> | <b><math>\alpha</math></b> | <b><math>\beta</math></b> | <b><math>\gamma</math></b> | <b>CgI perp.</b> | <b>CgJ perp.</b> |
|------------------------|-------------------|----------------------------|---------------------------|----------------------------|------------------|------------------|
| CgC…CgX2 <sup>2</sup>  | 3.497(4)          | 4.0(4)                     | 18.27                     | 21.30                      | 3.259(3)         | -3.321(3)        |
| CgC…CgX3 <sup>2</sup>  | 4.763(5)          | 6.0(4)                     | 42.30                     | 48.30                      | 3.168(3)         | -3.523(4)        |
| CgC…CgZ2               | 3.665(4)          | 8.7(4)                     | 19.54                     | 24.71                      | -3.330(3)        | 3.454(3)         |
| CgU1…CgU2 <sup>6</sup> | 3.818(5)          | 0.6(4)                     | 25.68                     | 26.15                      | -3.427(3)        | -3.441(4)        |
| CgU1…CgU3 <sup>6</sup> | 3.687(5)          | 1.5(4)                     | 22.30                     | 22.56                      | -3.405(3)        | -3.411(3)        |
| CgU1…CgV3              | 4.901(5)          | 8.6(4)                     | 45.61                     | 44.81                      | -3.477(3)        | 3.428(3)         |
| CgU2…CgU3 <sup>6</sup> | 4.411(5)          | 1.0(4)                     | 39.04                     | 39.33                      | -3.412(4)        | -3.426(3)        |
| CgU2…CgV1              | 4.719(5)          | 8.2(4)                     | 48.71                     | 40.64                      | -3.581(4)        | 3.114(3)         |
| CgU2…CgV2              | 3.839(5)          | 8.2(4)                     | 15.09                     | 21.31                      | -3.576(4)        | 3.707(3)         |
| CgU2…CgV3              | 3.730(5)          | 8.0(4)                     | 23.37                     | 16.28                      | -3.580(4)        | 3.424(3)         |
| CgU3…CgU3 <sup>6</sup> | 3.597(5)          | 0                          | 18.14                     | 18.14                      | -3.418(3)        | -3.418(3)        |
| CgU3…CgV1              | 4.269(5)          | 7.2(4)                     | 42.05                     | 37.95                      | -3.366(3)        | 3.170(3)         |
| CgU3…CgV3              | 3.644(5)          | 7.0(4)                     | 19.24                     | 22.28                      | -3.372(3)        | 3.440(3)         |
| CgV1…CgY1              | 3.618(6)          | 8.0(5)                     | 21.39                     | 29.28                      | -3.156(3)        | 3.369(5)         |
| CgV1…CgY3              | 4.585(6)          | 8.3(5)                     | 40.48                     | 46.57                      | -3.152(3)        | 3.487(5)         |
| CgV1…CgW1              | 3.56(1)           | 5.2                        | 21.18                     | 24.14                      | -3.248(3)        | 3.32(1)          |
| CgV1…CgW2              | 4.98(2)           | 9                          | 47.30                     | 49.36                      | -3.242(3)        | 3.38(3)          |
| CgV1…CgW3              | 3.54(2)           | 6.7                        | 23.54                     | 23.62                      | -3.242(3)        | 3.24(2)          |
| CgV2…CgY2              | 3.660(7)          | 9.1(6)                     | 28.46                     | 19.42                      | -3.451(3)        | 3.217(6)         |
| CgV2…CgY3              | 3.764(6)          | 8.7(5)                     | 21.94                     | 23.36                      | -3.456(3)        | 3.492(5)         |
| CgV2…CgW2              | 3.76(3)           | 9                          | 26.52                     | 17.43                      | -3.582(3)        | 3.36(2)          |
| CgV2…CgW3              | 4.63(2)           | 7                          | 45.67                     | 40.23                      | -3.535(3)        | 3.24(2)          |
| CgV3…CgY1              | 3.698(6)          | 8.0(5)                     | 24.55                     | 20.83                      | -3.456(3)        | 3.363(5)         |
| CgV3…CgY2              | 4.566(7)          | 8.6(6)                     | 44.75                     | 40.25                      | -3.485(3)        | 3.242(6)         |
| CgV3…CgY3              | 3.621(6)          | 8.3(5)                     | 15.58                     | 17.36                      | -3.456(3)        | 3.488(5)         |
| CgV3…CgW1              | 3.81(1)           | 5.3                        | 29.65                     | 24.70                      | -3.463(3)        | 3.31(1)          |
| CgV3…CgW2              | 4.50(3)           | 9                          | 41.20                     | 37.45                      | -3.568(3)        | 3.38(3)          |
| CgV3…CgW3              | 4.08(2)           | 6.7                        | 37.39                     | 30.96                      | -3.501(3)        | 3.24(2)          |
| CgX1…CgZ2              | 3.594(5)          | 2.1(4)                     | 5.28                      | 3.22                       | 3.588(3)         | -3.580(3)        |
| CgX1…CgZ3              | 4.413(5)          | 3.5(4)                     | 38.02                     | 35.04                      | 3.614(3)         | -3.477(3)        |
| CgX2…CgZ1              | 4.580(5)          | 8.4(4)                     | 44.37                     | 45.26                      | 3.224(4)         | -3.274(3)        |
| CgX3…CgZ1              | 3.964(5)          | 6.2(4)                     | 33.66                     | 29.51                      | 3.450(4)         | -3.299(3)        |
| CgX3…CgZ2              | 4.133(5)          | 2.8(4)                     | 29.81                     | 32.35                      | 3.491(4)         | -3.586(3)        |
| CgX3…CgZ3              | 3.908(5)          | 4.1(4)                     | 25.77                     | 27.83                      | 3.456(4)         | -3.519(3)        |
| CgY1…CgY1 <sup>7</sup> | 3.955(7)          | 7                          | 30.92                     | 30.92                      | 3.393(5)         | 3.393(5)         |
| CgY1…CgY2 <sup>7</sup> | 4.078(7)          | 6.6(7)                     | 31.13                     | 33.83                      | 3.388(5)         | 3.491(6)         |
| CgY1…CgY3 <sup>7</sup> | 3.785(7)          | 6.5(6)                     | 19.49                     | 25.96                      | 3.403(5)         | 3.568(5)         |
| CgY1…CgW1 <sup>7</sup> | 4.12(1)           | 10.3                       | 34.59                     | 38.00                      | 3.252(5)         | 3.40(1)          |
| CgY1…CgW2 <sup>7</sup> | 3.82(2)           | 6                          | 28.62                     | 30.27                      | 3.296(5)         | 3.35(3)          |
| CgY1…CgW3 <sup>7</sup> | 3.41(2)           | 7.9                        | 21.68                     | 13.92                      | 3.313(5)         | 3.17(2)          |
| CgY2…CgW1 <sup>7</sup> | 3.99(1)           | 10.6                       | 31.63                     | 23.55                      | 3.660(6)         | 3.40(1)          |
| CgY3…CgY3 <sup>7</sup> | 3.999(7)          | 6                          | 27.15                     | 27.15                      | 3.558(5)         | 3.558(5)         |
| CgY3…CgW1 <sup>7</sup> | 3.91(1)           | 10.3                       | 29.36                     | 21.97                      | 3.629(5)         | 3.41(1)          |
| CgY3…CgW3 <sup>7</sup> | 4.58(1)           | 7.8                        | 46.16                     | 39.20                      | 3.546(5)         | 3.17(2)          |
| CgW1…CgW1 <sup>7</sup> | 4.29(1)           | 12                         | 41.37                     | 41.37                      | 3.23(1)          | 3.22(1)          |

|                          |         |    |       |       |         |         |
|--------------------------|---------|----|-------|-------|---------|---------|
| CgW1...CgW2 <sup>7</sup> | 3.74(2) | 10 | 20.79 | 28.00 | 3.31(1) | 3.50(3) |
| CgW1...CgW3 <sup>7</sup> | 3.38(2) | 11 | 22.78 | 11.98 | 3.31(1) | 3.12(2) |
| CgW3...CgW3 <sup>7</sup> | 3.63(2) | 9  | 31.27 | 31.27 | 3.10(2) | 3.10(2) |

Symmetry operations: (1)  $-1/2+x, 1/2+y, z$ ; (2)  $x, -1+y, z$ ; (3)  $x, 1+y, z$ ; (4)  $1/2-x, 1/2-y, -z$ ; (5)  $-1/2+x, -1/2+y, z$ ; (6)  $-x, 1-y, -z$ ; (7)  $-x, y, 1/2-z$ .

CgI – center of gravity of ring number I;  $\alpha$  – dihedral angle between planes I and J ( $^\circ$ );  $\beta$  – angle between Cg I...Cg J vector and normal to plane I ( $^\circ$ );  $\gamma$  – angle between Cg I...Cg J vector and normal to plane J ( $^\circ$ ); Cg...Cg – distance between ring centroids ( $\text{\AA}$ ); CgI perp. – perpendicular distance of CgI on ring J ( $\text{\AA}$ ); CgJ perp. – perpendicular distance of CgJ on ring I ( $\text{\AA}$ );  $\perp d(\text{H}\cdots\pi)$  – distance between H atom and plane of the ring

**Table S3. Interactions present in the structure of complex 3.**

| Hydrogen bonding ( $\text{\AA}$ and $^\circ$ ) |          |                |                |                       |
|------------------------------------------------|----------|----------------|----------------|-----------------------|
| $D-H\cdots A$                                  | $d(D-H)$ | $d(H\cdots A)$ | $d(D\cdots A)$ | $\angle(D-H\cdots A)$ |
| O4B—H4B1...O4C                                 | 0.84     | 1.86           | 2.558(4)       | 139                   |
| O4D—H4D1...O4E                                 | 0.84     | 1.89           | 2.725(4)       | 177                   |
| O4F—H4F1...O4G                                 | 0.84     | 1.86           | 2.547(4)       | 138                   |
| O4H—H4H1...O4A                                 | 0.84     | 1.87           | 2.706(4)       | 171                   |
| N1X—H1XN...O6W                                 | 0.88     | 2.07           | 2.901(4)       | 156                   |
| N2Q—H2QN...O12W                                | 0.88     | 1.99           | 2.806(6)       | 153                   |
| N2Z—H2ZN...O7W                                 | 0.88     | 2.02           | 2.869(7)       | 161                   |
| N1L—H1LN...O7W                                 | 0.88     | 2.27           | 2.893(8)       | 127                   |
| N1W—H1WN...O13W                                | 0.88     | 1.87           | 2.732(5)       | 166                   |
| N2U—H2UN...O6W                                 | 0.88     | 2.12           | 2.866(5)       | 142                   |
| N1T—H1TN...O11W                                | 0.88     | 2.00           | 2.858(5)       | 166                   |
| N2R—H2RN...O1D <sup>1</sup>                    | 0.88     | 1.98           | 2.766(4)       | 149                   |
| N2Y—H2YN...O7W                                 | 0.88     | 1.94           | 2.760(5)       | 154                   |
| N1P—H1PN...O1W <sup>2</sup>                    | 0.88     | 1.85           | 2.659(4)       | 151                   |
| N2O—H2ON...O9W <sup>3</sup>                    | 0.88     | 1.91           | 2.696(6)       | 148                   |
| N1V—H1VN...O32W                                | 0.88     | 2.16           | 3.02(2)        | 166                   |
| N2M—H2MN...O28W                                | 0.88     | 2.27           | 3.12(3)        | 160                   |
| N1K—H1KN...O34W                                | 0.88     | 2.38           | 3.22(3)        | 160                   |
| N1N—H1NN...O2H1                                | 0.88     | 2.24           | 3.110(1)       | 168                   |
| N1N—H1NN...O2H2                                | 0.88     | 2.11           | 2.956(1)       | 162                   |
| O1W—H1W1...O2F <sup>4</sup>                    | 0.85(6)  | 1.95(6)        | 2.764(4)       | 162                   |
| O1W—H1W2...O3W                                 | 0.84(6)  | 1.89(6)        | 2.718(4)       | 171                   |
| O2W—H2W1...O3E <sup>4</sup>                    | 0.90(6)  | 1.90(6)        | 2.791(4)       | 169                   |
| O2W—H2W2...O2E <sup>5</sup>                    | 0.78(6)  | 2.12(6)        | 2.900(4)       | 174                   |
| O3W—H3W1...O1D <sup>1</sup>                    | 0.91(6)  | 2.00(6)        | 2.888(4)       | 162                   |
| O3W—H3W2...O3C1 <sup>1</sup>                   | 0.84(6)  | 2.06(6)        | 2.85(2)        | 155                   |
| O4W—H4W1...O3A <sup>6</sup>                    | 0.93(6)  | 1.82(6)        | 2.744(5)       | 175                   |
| O4W—H4W2...O1A <sup>3</sup>                    | 0.81(6)  | 2.07(6)        | 2.866(5)       | 170                   |
| O5W—H5W1...O2E <sup>5</sup>                    | 0.97(6)  | 1.81(6)        | 2.766(5)       | 168                   |
| O5W—H5W2...O1F <sup>4</sup>                    | 0.89(6)  | 1.88(6)        | 2.764(4)       | 177                   |
| O6W—H6W1...O2W                                 | 0.95(6)  | 2.04(6)        | 2.886(4)       | 147                   |
| O6W—H6W2...O1F <sup>4</sup>                    | 0.93(6)  | 1.85(6)        | 2.778(4)       | 172                   |
| O8W—H8W1...O5W <sup>3</sup>                    | 0.95(6)  | 1.80(6)        | 2.736(5)       | 167                   |
| O8W—H8W2...O3D                                 | 0.95(6)  | 1.86(6)        | 2.805(5)       | 175                   |
| O10W—H1WW...O1E                                | 0.85(4)  | 2.04(4)        | 2.882(5)       | 171                   |
| O10W—H2WW...O8W                                | 0.83(5)  | 1.94(5)        | 2.768(6)       | 177                   |
| O13W—H6WW...O14W                               | 0.84(5)  | 1.84(6)        | 2.670(7)       | 168                   |
| O14W—H7WW...O3E <sup>4</sup>                   | 0.94(5)  | 2.47(9)        | 2.801(6)       | 101                   |
| O14W—H8WW...O3G                                | 0.83(7)  | 2.04(8)        | 2.732(7)       | 140                   |
| O15W—H5W3...O2C1                               | 0.92(6)  | 1.95(6)        | 2.87(2)        | 175                   |
| O15W—H5W4...O3A <sup>6</sup>                   | 0.80(3)  | 2.05(3)        | 2.849(5)       | 175                   |

|                                |         |         |           |     |
|--------------------------------|---------|---------|-----------|-----|
| O16W—H6W4···O11W               | 0.85(8) | 2.06(8) | 2.797(8)  | 145 |
| C1L—H1L···N1Y                  | 0.95    | 2.47    | 3.390(8)  | 164 |
| C1N—H1N···O2A <sup>7</sup>     | 0.95    | 2.43    | 3.178(6)  | 136 |
| C1O—H1O···O3G <sup>3</sup>     | 0.95    | 2.59    | 3.283(8)  | 130 |
| C1P—H1P···O2F <sup>5</sup>     | 0.95    | 2.56    | 3.153(5)  | 121 |
| C1U—H1U···O5W                  | 0.95    | 2.59    | 3.436(6)  | 149 |
| C1W—H1W···O2W                  | 0.95    | 2.34    | 3.268(5)  | 166 |
| C1X—H1X···O3F <sup>4</sup>     | 0.95    | 2.25    | 3.180(5)  | 167 |
| C2P—H2P···O1E <sup>4</sup>     | 0.95    | 2.38    | 3.197(6)  | 144 |
| C2R—H2R···O1C1 <sup>1</sup>    | 0.95    | 2.58    | 3.120(18) | 116 |
| C2U—H2U···O3D <sup>5</sup>     | 0.95    | 2.50    | 3.242(5)  | 135 |
| C2X—H2X···O1G <sup>4</sup>     | 0.95    | 2.60    | 3.205(8)  | 122 |
| C2Z—H3L···O4G                  | 1.00    | 2.48    | 3.387(9)  | 150 |
| C3P—H3P···O1G                  | 0.95    | 2.39    | 3.259(8)  | 152 |
| C3R—H3R···O17W <sup>4</sup>    | 0.95    | 2.48    | 3.361(8)  | 154 |
| C3X—H3X···O1G <sup>4</sup>     | 0.95    | 2.55    | 3.180(7)  | 124 |
| C3Z—H3Z···O4F                  | 0.95    | 2.56    | 3.487(9)  | 166 |
| C3Z—H3Z···O4G                  | 0.95    | 2.31    | 2.984(9)  | 128 |
| C4A—H4A···O3A <sup>8</sup>     | 0.95    | 2.65    | 3.454(1)  | 143 |
| C4E—H4E···O3E <sup>8</sup>     | 0.95    | 2.56    | 3.375(2)  | 144 |
| C6O—H6O···O2B1 <sup>9</sup>    | 0.95    | 2.43    | 3.03(2)   | 121 |
| C6O—H6O···O21W <sup>3</sup>    | 0.95    | 2.53    | 3.298(8)  | 138 |
| C6P—H6P···O3C1 <sup>10</sup>   | 0.95    | 2.46    | 3.04(3)   | 119 |
| C6Q—H6Q···O4W                  | 0.95    | 2.57    | 3.342(7)  | 139 |
| C6R—H6R···O2D <sup>1</sup>     | 0.95    | 2.38    | 3.171(5)  | 140 |
| C6U—H6U···N2X                  | 0.95    | 2.34    | 3.240(5)  | 158 |
| C6Y—H6Y···O1B1 <sup>6</sup>    | 0.95    | 2.51    | 3.45(1)   | 169 |
| C7D—H7D1···O16W                | 0.99    | 2.39    | 3.321(7)  | 156 |
| C7O—H7O···O2A <sup>7</sup>     | 0.95    | 2.30    | 3.165(7)  | 151 |
| C7R—H7R···O2D                  | 0.95    | 2.54    | 3.335(6)  | 142 |
| C7W—H7W···O4A                  | 0.95    | 2.56    | 3.439(5)  | 154 |
| C8R—H8R···O10W                 | 0.95    | 2.43    | 3.273(6)  | 149 |
| C8U—H8U···O4C                  | 0.95    | 2.36    | 3.203(5)  | 147 |
| C8W—H8W···O15W <sup>5</sup>    | 0.95    | 2.43    | 3.329(6)  | 159 |
| C8Y—H8Y···O2C1 <sup>6</sup>    | 0.95    | 2.43    | 3.34(1)   | 160 |
| C11L—H11L···O4F                | 0.95    | 2.43    | 3.364(9)  | 168 |
| C11P—H11P···O2G                | 0.95    | 2.45    | 3.322(7)  | 153 |
| C11Q—H11Q···O3G <sup>3</sup>   | 0.95    | 2.50    | 3.445(6)  | 175 |
| C11R—H11R···O1G <sup>4</sup>   | 0.95    | 2.57    | 3.269(8)  | 131 |
| C12O—H12O···O1C1 <sup>11</sup> | 0.95    | 2.57    | 3.34(2)   | 138 |
| C12U—H12U···O4B                | 0.95    | 2.52    | 3.451(5)  | 168 |
| C7H—H7H2···O4H                 | 0.95    | 2.56    | 2.939(5)  | 102 |

Symmetry operations: (1) 1-x,-y,1-z; (2) -x,1-y,1-z; (3) 1+x,y,z; (4) 1-x,1-y,1-z; (5) -1+x,y,z; (6) 1-x,-y,-z; (7) 1-x,1-y,-z; (8) 2-x,1-y,1-z; (9) 1+x,1+y,z; (10) -1+x,1+y,z; (11) x,1+y,z.

#### Interactions X—H··· $\pi$ (Å and °)

| C—H···CgJ                  | $d(\text{H}\cdots\text{Cg})$ | $\perp d(\text{H}\cdots\pi)$ | $\gamma$ | $\angle \text{C—H}\cdots\text{Cg}$ | $d(\text{C}\cdots\text{Cg})$ | $\angle \text{C—H}, \pi$ |
|----------------------------|------------------------------|------------------------------|----------|------------------------------------|------------------------------|--------------------------|
| C2Y—H2Y···CgC              | 2.68                         | -2.63                        | 10.31    | 142                                | 3.475(2)                     | 62                       |
| C3O—H3O···CgF              | 2.54                         | 2.51                         | 8.77     | 144                                | 3.360(2)                     | 59                       |
| C3W—H3W···CgD <sup>1</sup> | 2.74                         | 2.59                         | 19.34    | 144                                | 3.554(2)                     | 72                       |
| C7Q—H7Q···CgA <sup>2</sup> | 2.93                         | -2.92                        | 6.56     | 139                                | 3.709(2)                     | 56                       |
| C7X—H7X···CgG              | 2.42                         | 2.41                         | 4.86     | 164                                | 3.342(2)                     | 75                       |
| C8P—H8P···CgB <sup>3</sup> | 2.45                         | -2.43                        | 6.76     | 146                                | 3.284(3)                     | 61                       |
| C8Q—H8Q···CgH <sup>2</sup> | 2.86                         | -2.72                        | 17.98    | 145                                | 3.681(3)                     | 72                       |
| C8X—H8X···CgF              | 2.77                         | -2.73                        | 9.68     | 164                                | 3.689(3)                     | 71                       |

|               |      |      |       |     |          |    |
|---------------|------|------|-------|-----|----------|----|
| C1V–H1V···CgH | 2.98 | 2.79 | 20.36 | 156 | 3.864(2) | 57 |
|---------------|------|------|-------|-----|----------|----|

**Interactions  $\pi\cdots\pi$  (Å and °)**

| <b>CgI···CgJ</b>         | <b><i>d</i>(CgI···CgJ)</b> | <b><math>\alpha</math></b> | <b><math>\beta</math></b> | <b><math>\gamma</math></b> | <b>CgI perp.</b> | <b>CgJ perp.</b> |
|--------------------------|----------------------------|----------------------------|---------------------------|----------------------------|------------------|------------------|
| CgA···CgY1               | 4.198(5)                   | 12.69                      | 32.07                     | 43.09                      | 3.066(1)         | 3.557(1)         |
| CgA···CgY3               | 4.131(6)                   | 12.76                      | 31.27                     | 41.99                      | 3.071(4)         | 3.531(4)         |
| CgC···CgR1 <sup>4</sup>  | 4.872(5)                   | 2.24                       | 51.81                     | 30.23                      | -4.209(4)        | 3.012(4)         |
| CgD···CgU2               | 4.963(4)                   | 7.27                       | 18.83                     | 53.16                      | -2.976(3)        | -4.698(3)        |
| CgE···CgW1 <sup>2</sup>  | 4.983(5)                   | 54.53                      | 5.69                      | 58.64                      | 2.593(4)         | 4.958(4)         |
| CgE···CgX2               | 4.423(5)                   | 9.06                       | 35.26                     | 43.49                      | -3.209(2)        | -3.611(2)        |
| CgE···CgX3               | 3.815(5)                   | 9.47                       | 25.52                     | 32.88                      | -3.204(4)        | -3.443(4)        |
| CgN1···CgO2              | 4.587(5)                   | 57.88                      | 34.07                     | 24.80                      | -4.164(4)        | 3.800(4)         |
| CgN1···CgY2 <sup>5</sup> | 4.416(5)                   | 58.72                      | 32.61                     | 28.91                      | 3.866(4)         | -3.720(4)        |
| CgN1···CgV3              | 4.711(4)                   | 2.21                       | 44.60                     | 43.06                      | -3.442(4)        | 3.354(4)         |
| CgN2···CgV1              | 3.655(5)                   | 1.56                       | 22.12                     | 22.95                      | -3.365(4)        | 3.386(4)         |
| CgN2···CgV1 <sup>5</sup> | 3.830(4)                   | 1.56                       | 29.20                     | 28.92                      | -3.352(3)        | -3.343(3)        |
| CgN2···CgV2              | 4.303(4)                   | 3.43                       | 40.79                     | 37.47                      | -3.415(4)        | 3.258(4)         |
| CgN2···CgV2 <sup>5</sup> | 4.308(4)                   | 3.43                       | 41.71                     | 39.11                      | -3.342(3)        | -3.216(4)        |
| CgN2···CgV3              | 3.605(4)                   | 1.85                       | 20.96                     | 21.75                      | -3.349(4)        | 3.367(4)         |
| CgN2···CgV3 <sup>5</sup> | 4.088(4)                   | 1.85                       | 35.60                     | 36.89                      | -3.270(1)        | -3.324(1)        |
| CgN3···CgV1              | 3.933(4)                   | 2.88                       | 30.21                     | 33.04                      | -3.297(4)        | 3.399(4)         |
| CgN3···CgV2 <sup>5</sup> | 4.571(4)                   | 2.11                       | 45.51                     | 44.48                      | -3.262(4)        | -3.203(4)        |
| CgN3···CgV3              | 4.076(4)                   | 0.27                       | 33.62                     | 33.77                      | -3.389(4)        | 3.394(4)         |
| CgO1···CgP1 <sup>2</sup> | 3.747(5)                   | 2.69                       | 24.16                     | 21.64                      | -3.483(3)        | 3.419(4)         |
| CgO1···CgP3 <sup>2</sup> | 4.011(4)                   | 1.36                       | 29.62                     | 29.92                      | -3.477(4)        | 3.487(4)         |
| CgO2···CgP2 <sup>2</sup> | 3.709(5)                   | 3.39                       | 24.95                     | 22.60                      | -3.424(3)        | 3.363(3)         |
| CgO2···CgP3 <sup>2</sup> | 4.059(5)                   | 2.35                       | 31.24                     | 32.10                      | -3.439(4)        | 3.471(4)         |
| CgO3···CgP1 <sup>2</sup> | 4.032(4)                   | 3.45                       | 31.85                     | 31.69                      | -3.431(4)        | 3.425(4)         |
| CgO3···CgP2 <sup>2</sup> | 3.959(4)                   | 3.37                       | 31.81                     | 29.42                      | -3.448(2)        | 3.364(2)         |
| CgO3···CgP3 <sup>2</sup> | 3.578(6)                   | 2.42                       | 14.38                     | 16.67                      | -3.428(3)        | 3.466(3)         |
| CgQ1···CgW1 <sup>2</sup> | 3.848(4)                   | 4.67                       | 29.42                     | 27.94                      | 3.400(3)         | -3.352(3)        |
| CgQ1···CgW2 <sup>2</sup> | 4.078(4)                   | 3.76                       | 34.91                     | 34.45                      | 3.363(2)         | -3.344(2)        |
| CgQ1···CgW3 <sup>2</sup> | 3.635(5)                   | 3.98                       | 25.81                     | 21.84                      | 3.374(4)         | -3.272(3)        |
| CgQ1···CgZ1              | 3.764(5)                   | 5.31                       | 33.01                     | 28.15                      | 3.319(3)         | 3.156(4)         |
| CgQ1···CgZ3              | 3.690(5)                   | 6.44                       | 23.89                     | 24.81                      | 3.349(1)         | 3.374(1)         |
| CgQ2···CgW2 <sup>2</sup> | 3.709(8)                   | 6.26                       | 25.59                     | 29.78                      | 3.219(4)         | -3.345(4)        |
| CgQ2···CgZ2              | 3.439(4)                   | 5.80                       | 11.36                     | 15.78                      | 3.309(4)         | 3.371(4)         |
| CgQ2···CgZ3              | 4.402(4)                   | 6.61                       | 41.62                     | 39.21                      | 3.411(4)         | 3.291(4)         |
| CgQ3···CgW2 <sup>2</sup> | 3.628(4)                   | 4.64                       | 24.04                     | 19.44                      | 3.421(4)         | -3.313(4)        |
| CgQ3···CgW3 <sup>2</sup> | 4.618(4)                   | 4.92                       | 44.98                     | 42.15                      | 3.424(4)         | -3.266(4)        |
| CgQ3···CgZ1              | 4.779(5)                   | 5.00                       | 48.47                     | 43.49                      | 3.467(4)         | 3.168(4)         |
| CgQ3···CgZ2              | 3.848(4)                   | 6.49                       | 29.77                     | 25.11                      | 3.484(4)         | 3.340(4)         |
| CgQ3···CgZ3              | 3.582(5)                   | 5.76                       | 19.26                     | 14.56                      | 3.467(3)         | 3.382(3)         |
| CgR2···CgT1              | 4.913(5)                   | 9.70                       | 57.31                     | 49.54                      | 3.188(4)         | 2.653(4)         |
| CgR2···CgT2 <sup>4</sup> | 3.733(4)                   | 10.09                      | 18.48                     | 28.56                      | 3.279(4)         | -3.541(4)        |
| CgR2···CgT3 <sup>4</sup> | 4.397(4)                   | 9.72                       | 37.14                     | 41.18                      | 3.309(4)         | -3.505(4)        |
| CgT1···CgU1              | 3.586(4)                   | 4.93                       | 15.55                     | 13.25                      | -3.490(2)        | -3.454(2)        |
| CgT1···CgU3              | 4.745(5)                   | 3.49                       | 45.02                     | 44.37                      | -3.392(3)        | -3.354(3)        |
| CgT2···CgU1              | 4.768(5)                   | 3.59                       | 44.12                     | 45.90                      | -3.318(4)        | -3.423(4)        |
| CgT2···CgU2              | 4.006(5)                   | 3.96                       | 34.34                     | 31.45                      | -3.417(4)        | -3.308(3)        |
| CgT2···CgU3              | 3.520(6)                   | 3.28                       | 15.04                     | 14.06                      | -3.415(4)        | -3.400(4)        |
| CgT3···CgU1              | 3.810(5)                   | 4.07                       | 24.91                     | 24.82                      | -3.458(4)        | -3.456(4)        |
| CgT3···CgU3              | 3.827(4)                   | 3.10                       | 27.46                     | 25.50                      | -3.454(3)        | -3.396(3)        |
| CgU1···CgW1              | 3.573(4)                   | 4.28                       | 21.03                     | 17.54                      | -3.407(4)        | 3.335(4)         |



|                          |          |      |       |       |           |           |
|--------------------------|----------|------|-------|-------|-----------|-----------|
| CgU1...CgW2              | 4.817(4) | 4.02 | 43.30 | 44.83 | -3.416(3) | 3.506(3)  |
| CgU1...CgW3              | 3.681(4) | 4.36 | 18.71 | 22.46 | -3.402(4) | 3.487(4)  |
| CgU2...CgW2              | 4.299(4) | 4.97 | 37.75 | 41.72 | -3.209(4) | 3.399(4)  |
| CgU3...CgW1              | 4.574(4) | 5.26 | 41.63 | 43.19 | -3.335(3) | 3.419(3)  |
| CgU3...CgW2              | 3.591(4) | 4.31 | 18.37 | 18.89 | -3.398(3) | 3.408(3)  |
| CgU3...CgW3              | 3.846(5) | 4.51 | 24.43 | 28.10 | -3.392(4) | 3.501(4)  |
| CgX1...CgX2 <sup>6</sup> | 3.489(5) | 4.01 | 16.90 | 18.50 | 3.308(3)  | 3.338(3)  |
| CgX1...CgX3 <sup>6</sup> | 4.245(4) | 3.18 | 41.04 | 39.57 | 3.272(4)  | 3.202(4)  |
| CgX2...CgX2 <sup>6</sup> | 4.966(4) | 0    | 48.58 | 48.58 | 3.285(4)  | 3.285(4)  |
| CgX2...CgX3 <sup>6</sup> | 3.643(5) | 1.08 | 25.18 | 24.30 | 3.320(3)  | 3.297(3)  |
| CgX3...CgX3 <sup>6</sup> | 3.673(4) | 0    | 26.54 | 26.54 | 3.286(4)  | 3.286(4)  |
| CgY1...CgY2 <sup>7</sup> | 3.582(4) | 3.25 | 22.22 | 19.46 | -3.377(4) | -3.316(4) |
| CgY1...CgY3 <sup>7</sup> | 3.776(4) | 1.23 | 28.37 | 27.29 | -3.356(4) | -3.322(4) |
| CgY2...CgY3 <sup>7</sup> | 4.083(6) | 2.48 | 36.23 | 36.28 | -3.292(4) | -3.294(4) |
| CgY3...CgY3 <sup>7</sup> | 3.550(4) | 0    | 20.63 | 20.63 | -3.323(4) | 3.323(4)  |
| CgZ1...CgV1              | 4.039(4) | 6.61 | 27.89 | 33.32 | 3.375(3)  | -3.570(3) |
| CgZ2...CgV2              | 3.629(4) | 3.71 | 11.74 | 14.16 | 3.519(3)  | -3.554(3) |
| CgZ2...CgV3              | 4.356(5) | 1.37 | 37.17 | 36.46 | 3.504(4)  | -3.471(4) |
| CgZ3...CgV1              | 3.789(4) | 4.74 | 20.92 | 23.72 | 3.469(4)  | -3.539(4) |
| CgZ3...CgV2              | 4.476(5) | 1.89 | 39.22 | 39.87 | 3.435(4)  | -3.467(4) |
| CgZ3...CgV3              | 3.840(4) | 2.16 | 23.60 | 23.96 | 3.509(4)  | -3.518(4) |
| CgL1...CgQ1              | 4.060(4) | 4.34 | 30.75 | 34.96 | 3.327(3)  | 3.489(3)  |
| CgL1...CgQ3              | 4.821(4) | 3.59 | 42.51 | 45.96 | 3.351(4)  | 3.554(4)  |
| CgL1...CgM1              | 3.697(5) | 5.97 | 26.32 | 32.24 | 3.127(2)  | -3.314(2) |
| CgL1...CgM3              | 4.032(4) | 8.37 | 37.28 | 41.90 | 3.001(3)  | -3.209(3) |
| CgL2...CgQ1              | 4.949(5) | 4.22 | 45.28 | 44.07 | 3.556(3)  | 3.483(4)  |
| CgL2...CgQ2              | 4.119(4) | 4.74 | 30.76 | 29.87 | 3.572(4)  | 3.539(4)  |
| CgL2...CgQ3              | 3.719(5) | 3.51 | 17.35 | 15.58 | 3.582(3)  | 3.550(4)  |
| CgL2...CgM1              | 4.626(4) | 6.11 | 44.15 | 42.83 | 3.392(4)  | -3.319(4) |
| CgL2...CgM2              | 3.613(5) | 3.74 | 20.02 | 18.58 | 3.424(3)  | -3.394(4) |
| CgL2...CgM3              | 3.880(4) | 8.48 | 34.22 | 25.92 | 3.490(4)  | -3.208(4) |
| CgL3...CgQ1              | 3.661(5) | 4.41 | 17.41 | 16.75 | 3.506(3)  | 3.493(3)  |
| CgL3...CgQ2              | 4.807(4) | 4.62 | 42.81 | 45.19 | 3.387(4)  | 3.526(4)  |
| CgL3...CgQ3              | 3.786(5) | 3.61 | 20.29 | 22.29 | 3.503(4)  | 3.551(4)  |
| CgL3...CgM1              | 3.440(4) | 5.87 | 15.67 | 12.60 | 3.357(4)  | -3.312(4) |
| CgL3...CgM2              | 4.846(5) | 3.52 | 45.37 | 45.63 | 3.389(3)  | -3.405(3) |
| CgL3...CgM3              | 3.890(4) | 8.32 | 34.25 | 30.59 | 3.348(4)  | -3.215(4) |
| CgM1...CgN2              | 3.629(5) | 1.65 | 20.69 | 19.07 | 3.430(4)  | -3.395(4) |
| CgM1...CgN2 <sup>5</sup> | 3.645(4) | 1.65 | 22.30 | 21.68 | -3.387(4) | -3.373(4) |
| CgM1...CgN3              | 4.236(5) | 2.49 | 37.66 | 35.21 | 3.461(5)  | -3.353(4) |
| CgM2...CgN2              | 4.488(4) | 2.20 | 41.40 | 43.14 | 3.275(4)  | -3.367(4) |
| CgM2...CgN2 <sup>5</sup> | 4.569(5) | 2.20 | 43.89 | 44.97 | -3.232(4) | -3.292(4) |
| CgM2...CgN3 <sup>5</sup> | 4.861(5) | 0.63 | 48.18 | 48.55 | -3.218(3) | -3.242(3) |
| CgM3...CgN2              | 3.874(4) | 4.74 | 29.68 | 28.93 | 3.390(4)  | -3.365(4) |
| CgM3...CgN2 <sup>5</sup> | 3.522(4) | 4.74 | 15.82 | 18.08 | -3.348(3) | -3.388(3) |
| CgM3...CgN3 <sup>5</sup> | 3.824(4) | 5.24 | 25.42 | 29.37 | -3.333(4) | -3.454(4) |

Symmetry operations: (1)  $-1+x,y,z$ ; (2)  $1+x,y,z$ ; (3)  $x,1+y,z$ ; (4)  $1-x,-y,1-z$ ; (5)  $1-x,1-y,-z$ ; (6)  $1-x,1-y,1-z$ ; (7)  $1-x,-y,-z$ .

CgI – center of gravity of ring I;  $\alpha$  – dihedral angle between planes I and J ( $^\circ$ );  $\beta$  – angle between Cg I...Cg J vector and normal to plane I ( $^\circ$ );  $\gamma$  – angle between Cg I...Cg J vector and normal to plane J ( $^\circ$ ); Cg...Cg – distance between ring centroids ( $\text{\AA}$ ); CgI perp. – perpendicular distance of CgI on ring J ( $\text{\AA}$ ); CgJ perp. – perpendicular distance of CgJ on ring I ( $\text{\AA}$ );  $\perp d(\text{H}\cdots\pi)$  – distance between H atom and plane of the ring
